# Supplementary material
Source: MDPI journal article supplement (https://www.mdpi.com/2071-1050/15/3/2805)
Supplement: s1 [file s1]

---

### Ideal Brayton cycles

For an ideal Brayton cycle (BC cycle), according to Fig.2 (a) the thermal efficiency may be expressed as:

$$\eta_{BC} = 1 - \pi^{\frac{1-\gamma}{\gamma}} \quad (E-S1)$$

Specific power may be expressed as:

$$P_{BC} = c_p T_2 \left( \tau - \tau \cdot \pi^{\frac{1-\gamma}{\gamma}} - \pi^{\frac{\gamma-1}{\gamma}} + 1 \right) \quad (E-S2)$$

The specific thrust of the engine based on the ideal Brayton cycle may be expressed as:

$$F_s = W_g c_{out} - W_a c_{in} + (p_{out} - p_{in}) \cdot A_{out} \quad (E-S3)$$

In this work, the working fluids completely expand with  $p_{out} = p_{in}$ . The mass flow of fuel is neglected with  $W_g = W_a$ , which is the unit mass. The intake velocity is zero.

Therefore, the specific thrust can be simplified as:

$$F_s = c_{out} = \sqrt{2 \cdot c_p T_2 \left( \tau - \tau \cdot \pi^{\frac{1-\gamma}{\gamma}} - \pi^{\frac{\gamma-1}{\gamma}} + 1 \right)} \quad (E-S4)$$

The nozzle exit velocity may be expressed as:

$$c_{out} = \sqrt{2 \cdot P_{BC}} \quad (E-S5)$$

The equation can be simplified to,

$$c_{out} = \sqrt{2 \cdot c_p T_2 \left( \tau - \tau \cdot \pi^{\frac{1-\gamma}{\gamma}} - \pi^{\frac{\gamma-1}{\gamma}} + 1 \right)} \quad (E-S6)$$

The energy fraction for the BC cycle is defined as the ratio of the compression power and the heat addition.

$$\psi_{BC} = \frac{P_{comp}}{\Delta H_{3-4} + P_{comp}} = \frac{\left( \pi^{\frac{\gamma-1}{\gamma}} - 1 \right)}{\tau - 1} \quad (E-S7)$$

### Ideal reheated Brayton cycles

For an ideal reheating Brayton cycle (RBC cycle), according to Fig.2 (b), the thermal efficiency can be expressed as :

$$\eta_{RBC} = \frac{(h_4 - h_3) + (h_{4.6} - h_{4.5}) - (h_5 - h_2)}{(h_4 - h_3) + (h_{4.6} - h_{4.5})} \quad (E-S8)$$

It can be acquired by simple derivation:

$$\eta_{RBC} = 1 - \frac{\pi_1^{\frac{1-\gamma}{\gamma}} \cdot \tau_2 - 1}{\tau_1 - \pi_1^{\frac{\gamma-1}{\gamma}} + \tau_2 - \pi_2^{\frac{1-\gamma}{\gamma}} \cdot \tau_1} \quad (E-S9)$$

The specific power can be expressed as:

$$P_{\text{RBC}} = (h_4 - h_{4.5}) + (h_{4.6} - h_5) - (h_3 - h_2) \quad (\text{E-S10})$$

In brief,

$$P_{\text{RBC}} = c_p T_2 \left( \tau_1 - \pi_2^{\frac{1-\gamma}{\gamma}} \cdot \tau_1 + \tau_2 - \pi_1^{\frac{1-\gamma}{\gamma}} \cdot \tau_2 - \pi^{\frac{\gamma-1}{\gamma}} + 1 \right) \quad (\text{E-S11})$$

The nozzle exit velocity can be expressed as:

$$c_{\text{out}} = \sqrt{2c_p T_2 \left( \tau_1 - \pi_2^{\frac{1-\gamma}{\gamma}} \cdot \tau_1 + \tau_2 - \pi_1^{\frac{1-\gamma}{\gamma}} \cdot \tau_2 - \pi^{\frac{\gamma-1}{\gamma}} + 1 \right)} \quad (\text{E-S12})$$

The specific thrust can be expressed as:

$$F_s = c_{\text{out}} = \sqrt{2c_p T_2 \left( \tau_1 - \pi_2^{\frac{1-\gamma}{\gamma}} \cdot \tau_1 + \tau_2 - \pi_1^{\frac{1-\gamma}{\gamma}} \cdot \tau_2 - \pi^{\frac{\gamma-1}{\gamma}} + 1 \right)} \quad (\text{E-S13})$$

The energy fraction for the RBC cycle is defined as the ratio of the compression power and the heat addition.

$$\psi_{\text{RBC}} = \frac{P_{\text{comp}}}{\Delta H_{3-4} + \Delta H_{4.5-4.6}} = \frac{\left( \pi^{\frac{\gamma-1}{\gamma}} - 1 \right)}{\tau_2 + \tau_1 + \pi^{\frac{\gamma-1}{\gamma}} - \pi_2^{\frac{1-\gamma}{\gamma}} \tau_1} \quad (\text{E-S14})$$

### Ideal reheated Brayton cycles with SOFCs

For an ideal reheated Brayton cycle with SOFCs (RBFC cycle), according to Fig.2 (d) the efficiency is:

$$\eta_{\text{RBFC}} = \frac{(h_4 - h_3) + (h_{4.6} - h_{4.5}) - (h_5 - h_2) + (h_3 - h_2)}{(h_4 - h_3) + (h_{4.6} - h_{4.5}) + (h_3 - h_2)} \quad (\text{E-S15})$$

This can be acquired by simple derivation:

$$\eta_{\text{RBFC}} = 1 - \frac{\pi_1^{\frac{1-\gamma}{\gamma}} \cdot \tau_2 - 1}{\tau_1 + \pi_2^{\frac{1-\gamma}{\gamma}} \cdot \tau_1 - \tau_2 - 1} \quad (\text{E-S16})$$

For the reheated Brayton cycle with SOFC (RBFC cycle), the specific power is

$$w_{\text{RBFC}} = (h_4 - h_{4.5}) + (h_{4.6} - h_5) \quad (\text{E-S17})$$

In brief,

$$w_{\text{RBFC}} = c_p T_2 \left( \tau_1 - \pi_2^{\frac{1-\gamma}{\gamma}} \cdot \tau_1 + \tau_2 - \pi_1^{\frac{1-\gamma}{\gamma}} \cdot \tau_2 \right) \quad (\text{E-S18})$$

The nozzle exit velocity can be expressed as:

$$c_{\text{out}} = \sqrt{2c_p T_2 \left( \tau_1 - \pi_2^{\frac{1-\gamma}{\gamma}} \cdot \tau_1 + \tau_2 - \pi_1^{\frac{1-\gamma}{\gamma}} \cdot \tau_2 \right)} \quad (\text{E-S19})$$

The specific thrust can be expressed as:

$$F_s = c_{\text{out}} = \sqrt{2c_p T_2 \left( \tau_1 - \pi_2^{\frac{1-\gamma}{\gamma}} \cdot \tau_1 + \tau_2 - \pi_1^{\frac{1-\gamma}{\gamma}} \cdot \tau_2 \right)} \quad (\text{E-S20})$$

The energy fraction of the RBFC cycle is defined as the ratio of the compression power and heat addition.

$$\psi_{\text{RBFC}} = \frac{P_{\text{comp}}}{\Delta H_{3-4} + \Delta H_{4.5-4.6} + P_{\text{ele}}} = \frac{\left(\pi^{\frac{\gamma-1}{\gamma}} - 1\right)}{\tau_1 + \tau_2 - \pi_2^{\frac{\gamma}{\gamma-1}} \cdot \tau_1 - 1} \quad (\text{E-S21})$$

According to Equation (11),

$$c_p \cdot T_2 \cdot \left(\pi^{\frac{\gamma-1}{\gamma}} - 1\right) = c_p \cdot (T_4 - T_3 + T_{4.6} - T_{4.5}) \cdot \left(\frac{1}{\phi \cdot \eta_{\text{fc}}} - 1\right)^{-1} \quad (\text{E-S22})$$

The fuel utilization in the RBFC cycle can be derived by Eq (E-S22) as

$$\phi_{\text{RBFC}} = \left\{ \eta_{\text{fc}} \left[ \left( \frac{\tau_1 - \pi_2^{\frac{\gamma-1}{\gamma}} + \tau_2 - \pi_2^{\frac{1-\gamma}{\gamma}} \cdot \tau_1}{\pi^{\frac{\gamma-1}{\gamma}} - 1} \right) + 1 \right] \right\}^{-1} \quad (\text{E-S23})$$

There is a maximum fuel utilization of the fuel cell in the BFC cycle, which can be expressed as:

$$\phi_{\text{RBFC,max}} = 1 - \frac{c_p \cdot (600 + 273.15 - T_2)}{c_p \cdot (T_4 - T_3) + c_p \cdot (T_3 - T_2) + c_p \cdot (T_{4.6} - T_{4.5})} \quad (\text{E-S24})$$

In brief,

$$\phi_{\text{RBFC,max}} = \frac{\tau_1 + \tau_2 - \pi_2^{\frac{\gamma}{\gamma-1}} \cdot \tau_1 + \frac{873.15}{T_2}}{\tau_1 + \tau_2 - \pi_2^{\frac{\gamma}{\gamma-1}} \cdot \tau_1 - 1} \quad (\text{E-S25})$$

In this work,  $T_2 = 280$  K. The maximum fuel utilization of the fuel cell in the BFC cycle is:

$$\phi_{\text{RBFC,max}} = \frac{\tau_1 + \tau_2 - \pi_2^{\frac{\gamma}{\gamma-1}} \cdot \tau_1 + 3.12}{\tau_1 + \tau_2 - \pi_2^{\frac{\gamma}{\gamma-1}} \cdot \tau_1 - 1} \quad (\text{E-S26})$$

### Ideal isothermal Brayton cycle with SOFCs

For an ideal isothermal Brayton cycle with SOFC (IBFC cycle), according to Fig.2 (e) the thermal efficiency is

$$\eta_{\text{RBFC}} = \frac{(h_4 - h_3) + (h_3 - h_2) - (h_5 - h_2) + (w_{4-4.5})}{(h_4 - h_3) + (h_{4.5} - h_4) + (h_3 - h_2) + (w_{4-4.5})} = \frac{(h_4 - h_3) + (h_3 - h_2) - (h_5 - h_2) + R_g T_4 \ln \pi_1}{(h_4 - h_3) + (h_{4.5} - h_4) + (h_3 - h_2) + R_g T_4 \ln \pi_1} \quad (\text{E-S27})$$

In brief,

$$\eta_{\text{RBFC}} = 1 - \frac{\pi_2^{\frac{1-\gamma}{\gamma}} \cdot \tau}{\tau - 1} \quad (\text{E-S28})$$

For an ideal isothermal Brayton cycle with SOFC (IBFC cycle), the specific power is

$$w_{\text{RB,cyc}} = w_{4-4.5} + (h_{4.5} - h_5) = -R_g T_4 \ln \frac{p_{4.5}}{p_4} + (h_{4.5} - h_5) \quad (\text{E-S29})$$

In brief,

$$w_{\text{RB,cyc}} = T_2 \left[ R_g \tau \ln \pi_1 + c_p \left( \tau - \pi_2^{\frac{1-\gamma}{\gamma}} \cdot \tau \right) \right] \quad (\text{E-S30})$$

The nozzle exit velocity may be expressed as:

$$c_{\text{out}} = \sqrt{T_2 \left[ R_g \tau \ln \pi_1 + c_p \left( \tau - \pi_2^{\frac{1-\gamma}{\gamma}} \cdot \tau \right) \right]} \quad (\text{E-S31})$$

According to Equation (E-S4), the specific thrust can be expressed as:

$$F_s = c_{\text{out}} = \sqrt{T_2 \left[ R_g \tau \ln \pi_1 + c_p \left( \tau - \pi_2^{\frac{1-\gamma}{\gamma}} \cdot \tau \right) \right]} \quad (\text{E-S32})$$

The energy fraction for the IBFC cycle is defined as the ratio of the compression power and the heat addition.

$$\psi_{\text{IBFC}} = \frac{P_{\text{comp}}}{\Delta H_{3-4} + w_{4-4.5} + P_{\text{ele}}} = \frac{h_3 - h_2}{h_4 - h_3 + R_g T_4 \ln \frac{p_4}{p_{4.5}} + h_3 - h_2} = \frac{\left( \pi^{\frac{\gamma-1}{\gamma}} - 1 \right)}{\frac{R_g}{c_p} \tau \ln \pi_1 + \tau - 1} \quad (\text{E-S33})$$

According to Equation (11),

$$c_p \cdot T_2 \cdot \left( \pi^{\frac{\gamma-1}{\gamma}} - 1 \right) = [c_p \cdot (T_4 - T_3) + R_g T_4 \ln \pi_1] \left( \frac{1}{\phi \cdot \eta_{\text{fc}}} - 1 \right)^{-1} \quad (\text{E-S34})$$

The fuel utilization in the IBFC cycle can be derived as

$$\phi_{\text{IBFC}} = \left\{ \eta_{\text{fc}} \left( \frac{\tau - \pi^{\frac{\gamma-1}{\gamma}} + \frac{R_g}{c_p} \tau \ln \pi_1}{\pi^{\frac{\gamma-1}{\gamma}} - 1} + 1 \right) \right\}^{-1} \quad (\text{E-S35})$$

There is a maximum fuel utilization of the fuel cell in the IBFC cycle, which can be expressed as:

$$\phi_{\text{IBFC,max}} = 1 - \frac{c_p \cdot (600 + 273.15 - T_2)}{c_p \cdot (T_4 - T_3) + c_p \cdot (T_3 - T_2) + R_g T_4 \ln \pi_1} \quad (\text{E-S36})$$

In brief,

$$\phi_{\text{IBFC,max}} = \frac{\tau + \frac{R_g}{c_p} \tau \ln \pi_1 - \frac{873.15}{T_2}}{\tau + \frac{R_g}{c_p} \tau \ln \pi_1 - 1} \quad (\text{E-S37})$$

In this work,  $T_2 = 280$  K. The maximum fuel utilization of the fuel cell in the IBFC cycle is:

$$\phi_{\text{IBFC,max}} = \frac{\tau + \frac{R_g}{c_p} \tau \ln \pi_1 - 3.12}{\tau + \frac{R_g}{c_p} \tau \ln \pi_1 - 1} \quad (\text{E-S38})$$
